# Supplementary material for: Single-crystal growth, structure and thermal transport properties of the metallic antiferromagnet Zintl-phase β-EuIn2As2
Source: Royal Society of Chemistry journal article supplement (doi:10.1039/d3cp04524b), 2023-11-01
Supplement: d3cp04524b1.pdf [file d3cp04524b1.pdf]

## Supporting information

### Single Crystal Growth, Structure and thermal transport properties

#### of the metallic antiferromagnet Zintl -phase $\beta$ - $\text{EuIn}_2\text{As}_2$

D. S. Wu<sup>1,2\*</sup>, S. H. Na<sup>1,2</sup>, Y. J. Li<sup>1,2</sup>, W. Wu<sup>1,2</sup>, X.B. Zhou<sup>1,2</sup>, P Zheng<sup>1,2</sup>, Z. Li<sup>1,2,3</sup>, J.

L. Luo<sup>1,2,3\*</sup>

<sup>1</sup>*Beijing National Laboratory for Condensed Matter Physics, Institute of Physics,*

*Chinese Academy of Sciences, Beijing 100190, China;*

<sup>2</sup>*School of Physical Sciences, University of Chinese Academy of Sciences, Beijing 100190, China;*

<sup>3</sup>*Songshan Lake Materials Laboratory, Dongguan, Guangdong 523808, China*

\*email address: [dswu@iphy.ac.cn](mailto:dswu@iphy.ac.cn); [jlluo@iphy.ac.cn](mailto:jlluo@iphy.ac.cn)

**Figure S1: The chemical composition analysis of  $\text{EuIn}_2\text{As}_2$  sample. The typical EDX spectrum of the  $\text{EuIn}_2\text{As}_2$  crystal collected at an accelerating voltage of 15 kV and an accumulation time of 60 s.**

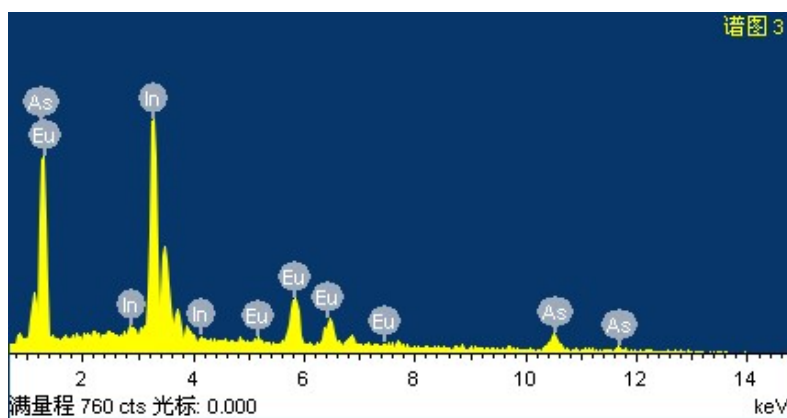

To get a more convincing result, we chose several different micro-crystals which are cracked from a bulk crystal for the analysis of the chemical compositions. The result shows that there are only the Eu, In and As elements in the crystals. The percentage of Eu 16.98% (18.40%), In 26.12% (40.88%), As 15.56 (40.72%), which is very close to the stoichiometric ratio 1: 2: 2 in  $\text{EuIn}_2\text{As}_2$
